# Supplementary material for: pH and thermosensitive 5-fluorouracil loaded poly(NIPAM-co-AAc) nanogels for cancer therapy
Source: Royal Society of Chemistry journal article supplement (doi:10.1039/c6ra18034e), 2016-01-01
Supplement: c6ra18034e1.pdf [file c6ra18034e1.pdf]

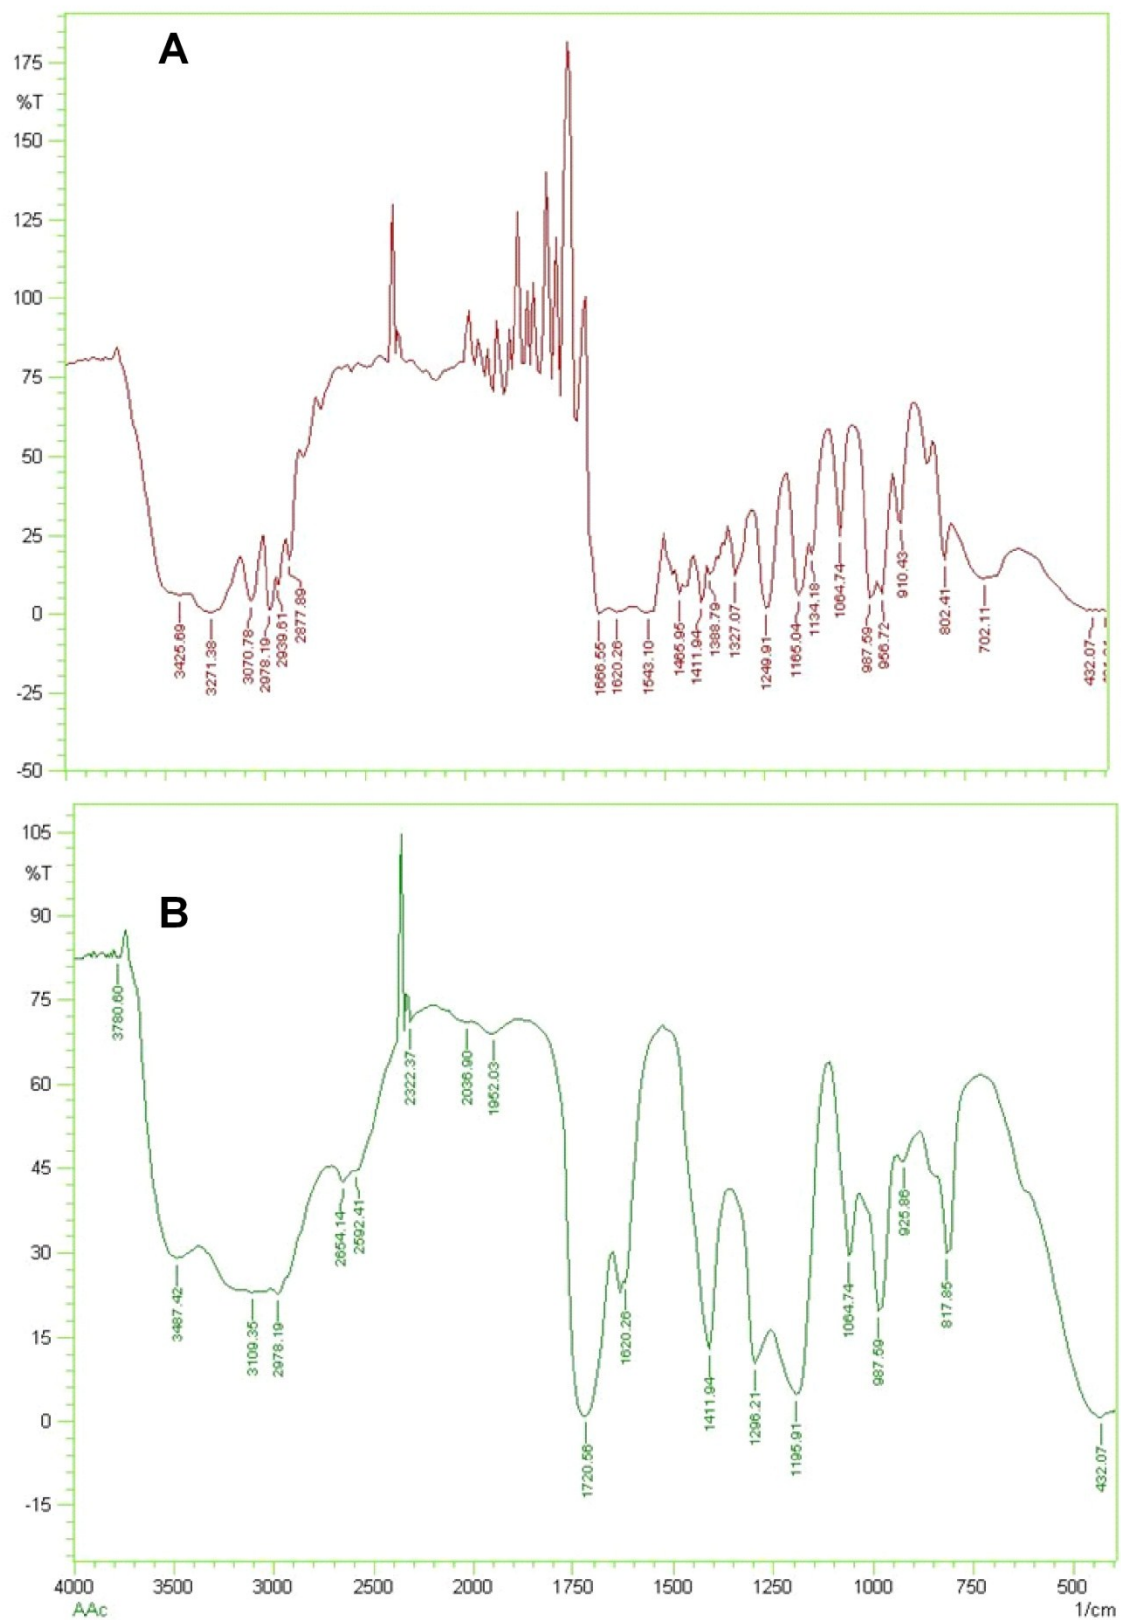

Figure S1: FT-IR spectral data of A) NIPAM, and B) AAC.

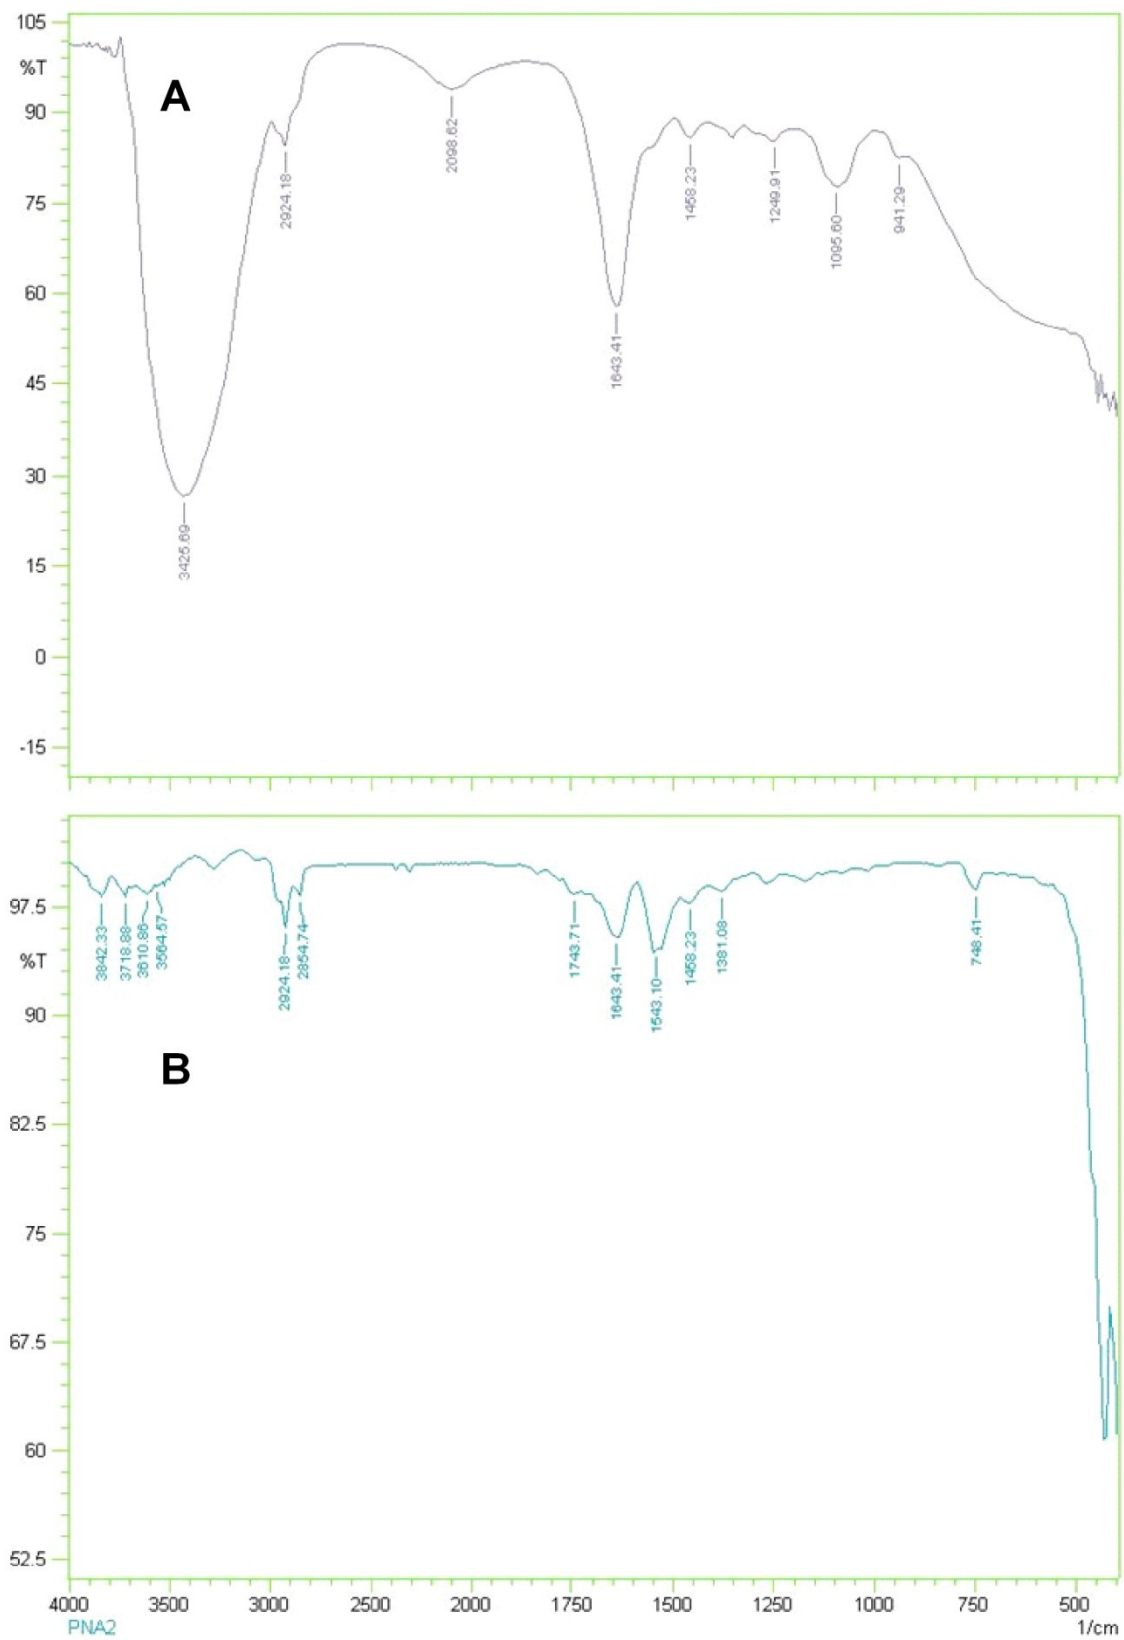

**Figure S2: FT-IR spectral data of A) PNA<sub>0</sub>, and B) PNA<sub>2</sub>.**

PNA-0  
D2O

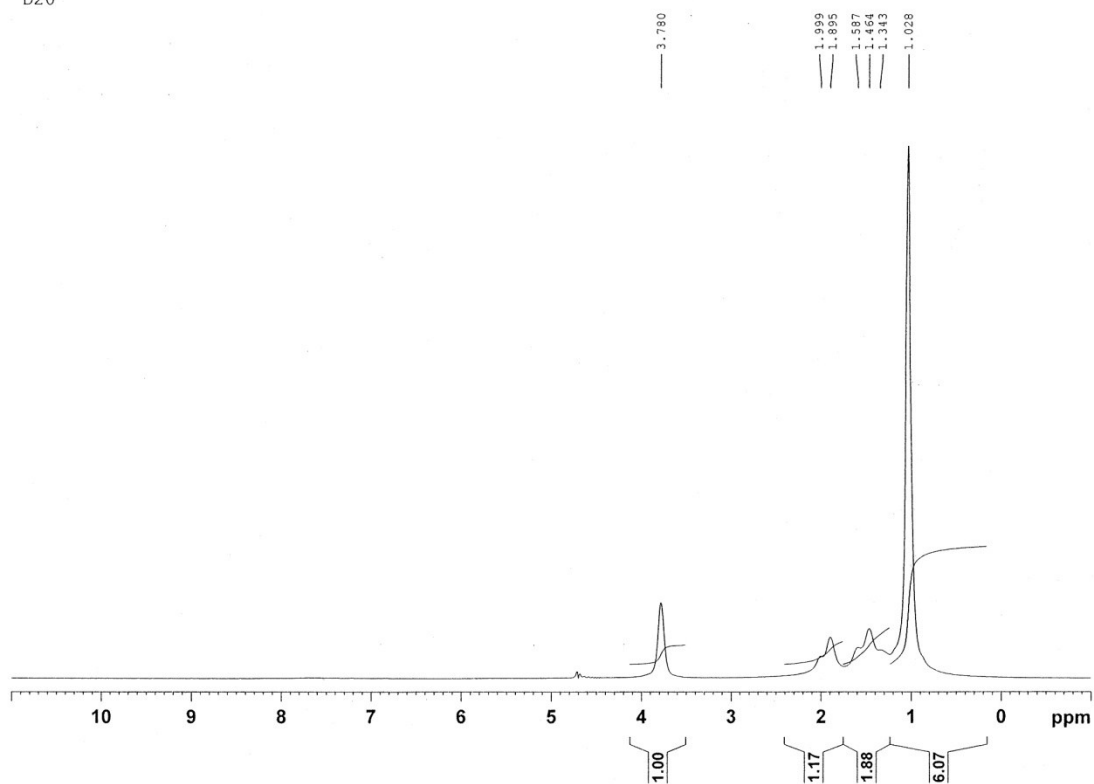

PNA-01  
D2O

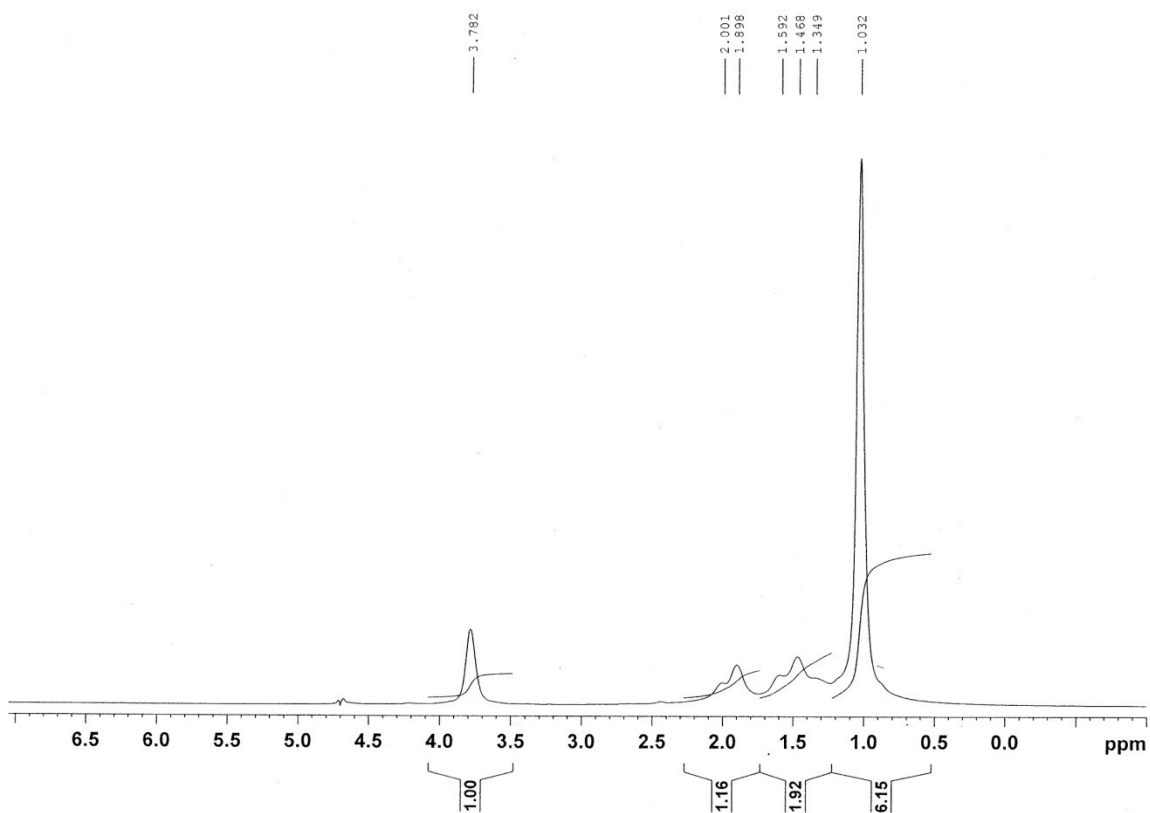

Figure S3:  $^1\text{H}$  NMR spectral analysis of  $\text{D}_2\text{O}$  swelled  $\text{PNA}_0$  and  $\text{PNA}_1$  Ng's.

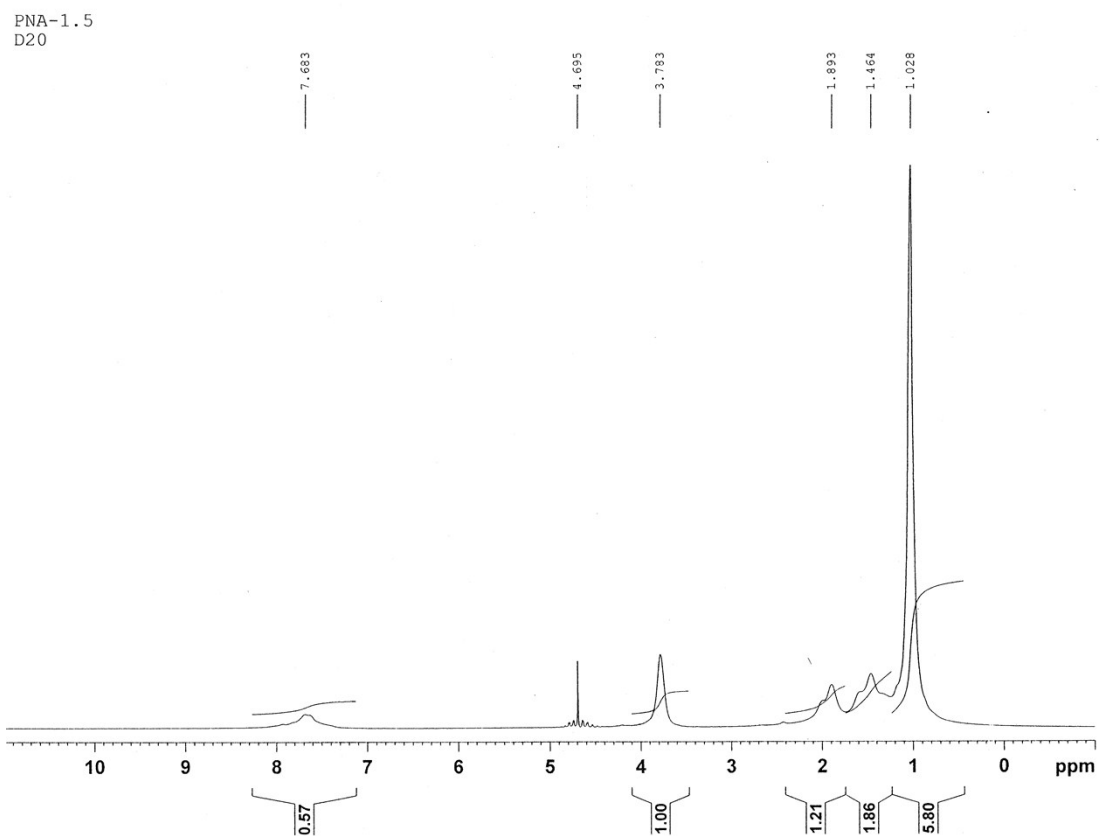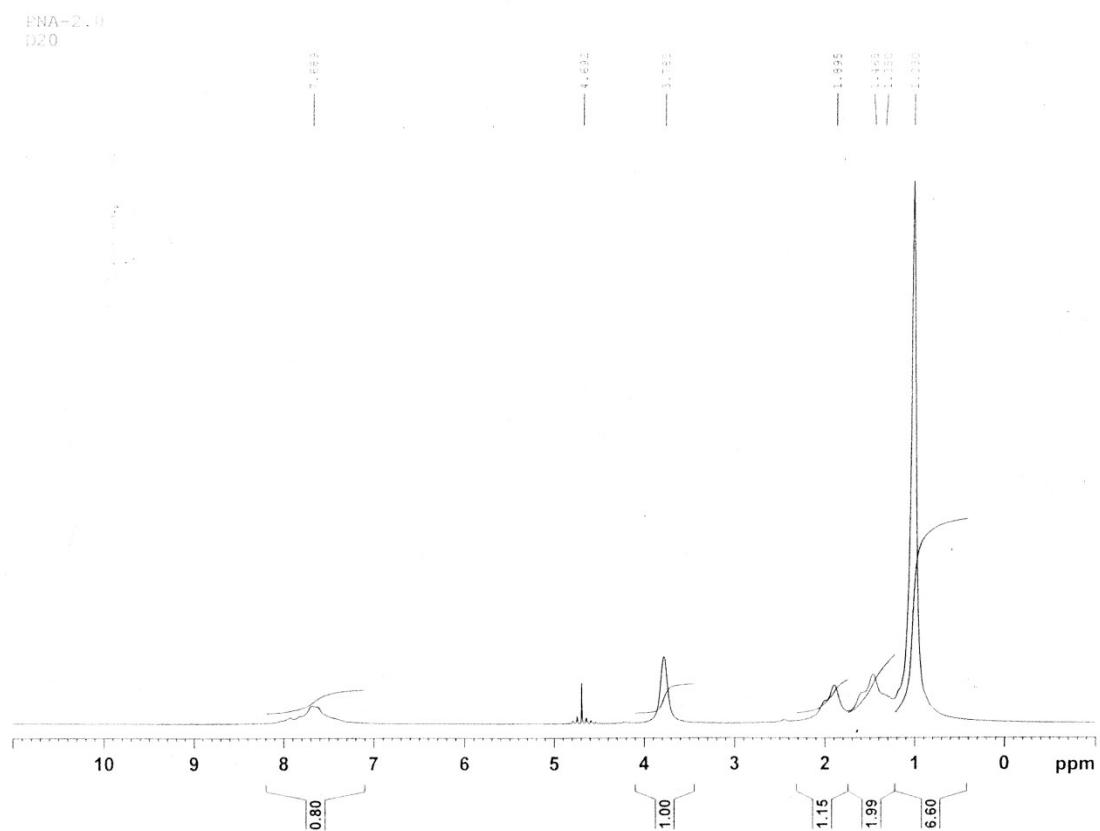

Figure S4:  $^1\text{H}$  NMR spectral analysis of  $\text{D}_2\text{O}$  swelled  $\text{PNA}_{1.5}$  and  $\text{PNA}_2$  Ng's.

PNA 2.5  
D2O

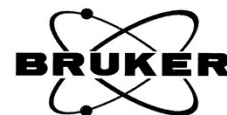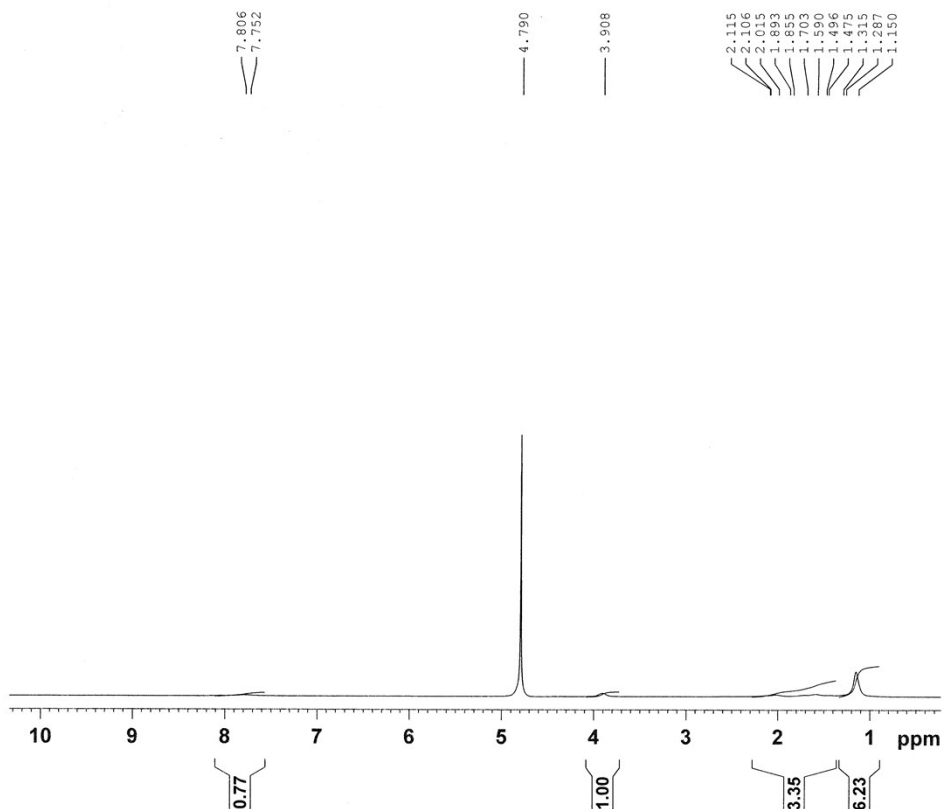

Current Data Parameters  
NAME test-25mar2015  
EXPNO 33  
PROCNO 1

F2 - Acquisition Parameters  
Date\_ 20160317  
Time\_ 15.08  
INSTRUM spect  
PROBHD 5 mm BBO BB-1H  
PULPROG zg30  
TD 65536  
SOLVENT D2O  
NS 64  
DS 2  
SWH 8278.146 Hz  
FIDRES 0.126314 Hz  
AQ 3.9584243 sec  
RG 4  
DW 60.400 usec  
DE 6.00 usec  
TE 300.2 K  
D1 1.00000000 sec  
MCREST 0.00000000 sec  
MCWRK 0.01500000 sec

===== CHANNEL f1 =====  
NUC1 1H  
P1 9.20 usec  
PL1 0.00 dB  
SFO1 400.1324710 MHz

F2 - Processing parameters  
SI 32768  
SF 400.1299645 MHz  
WDW EM  
SSB 0  
LB 0.30 Hz  
GB 0  
PC 1.00

Analysed By:

Figure S5: <sup>1</sup>H NMR spectral analysis of D<sub>2</sub>O swelled PNA<sub>2.5</sub> Ng's.

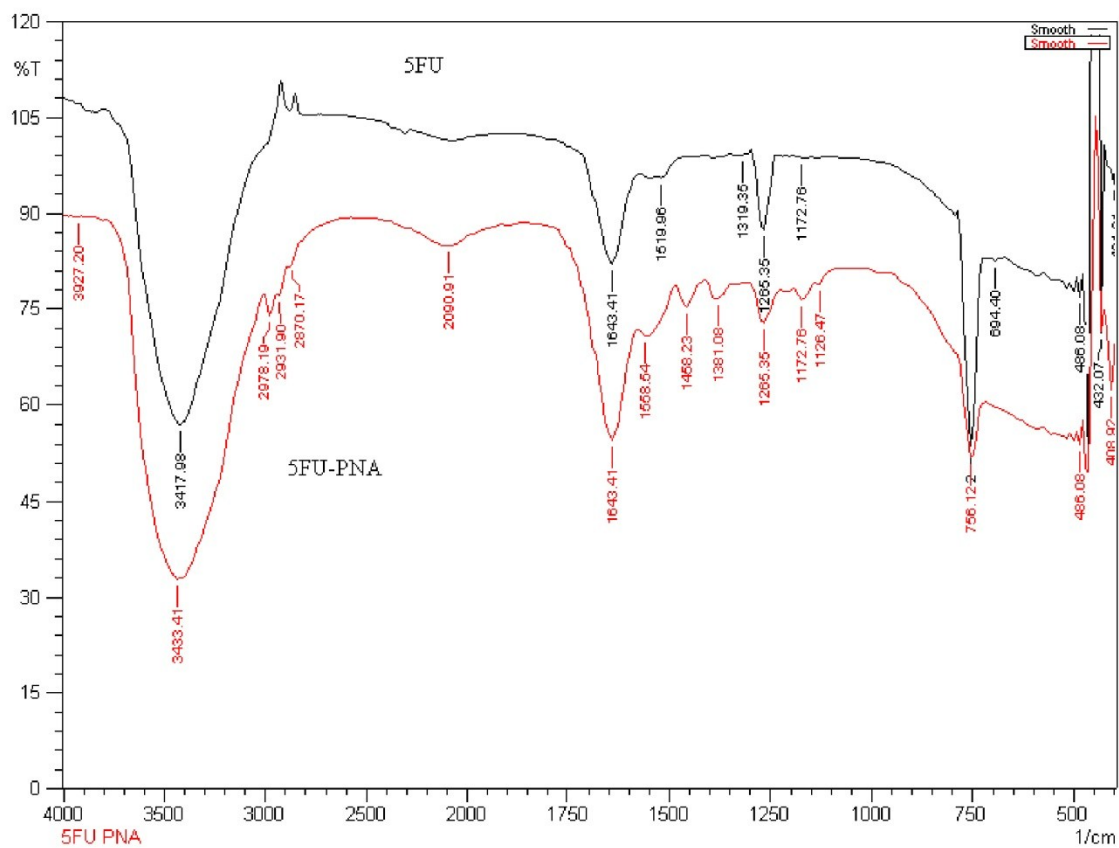

**Figure S6: FTIR spectra of 5-FU and 5-FU-PNA Ng's.**
